# Supplementary material
Source: PubMed Central journal article supplement (PMC2894262)
Supplement: NIHMS187273-supplement-Supp_Fig_1.pdf [file NIHMS187273-supplement-Supp_Fig_1.pdf]

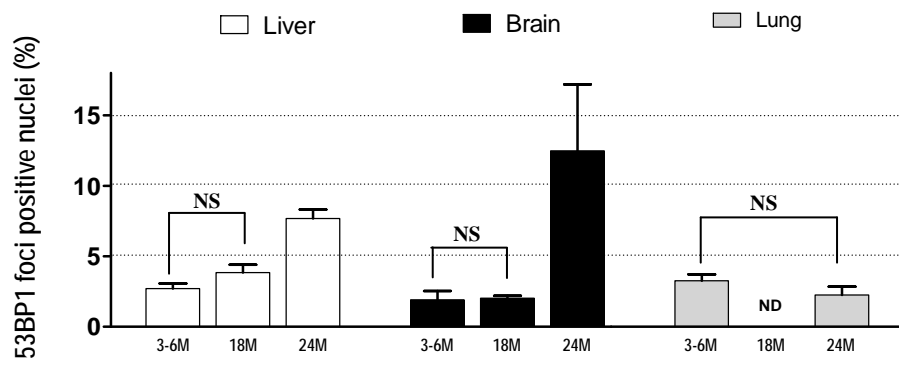

Le et al. Figure S1

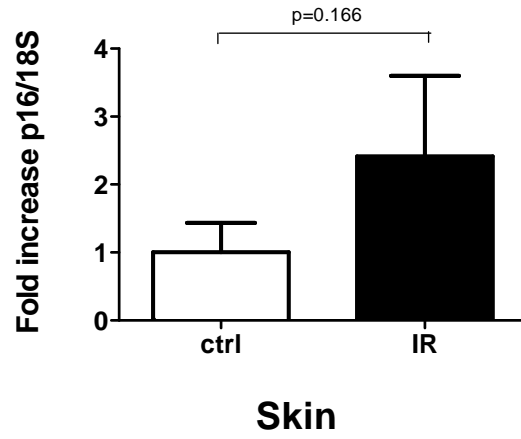

Le et al. Figure S2

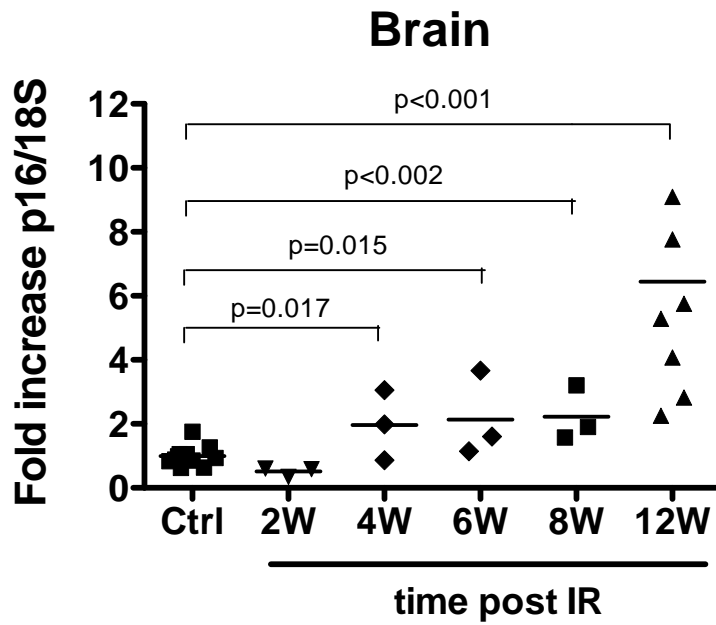

Le et al. Figure S3

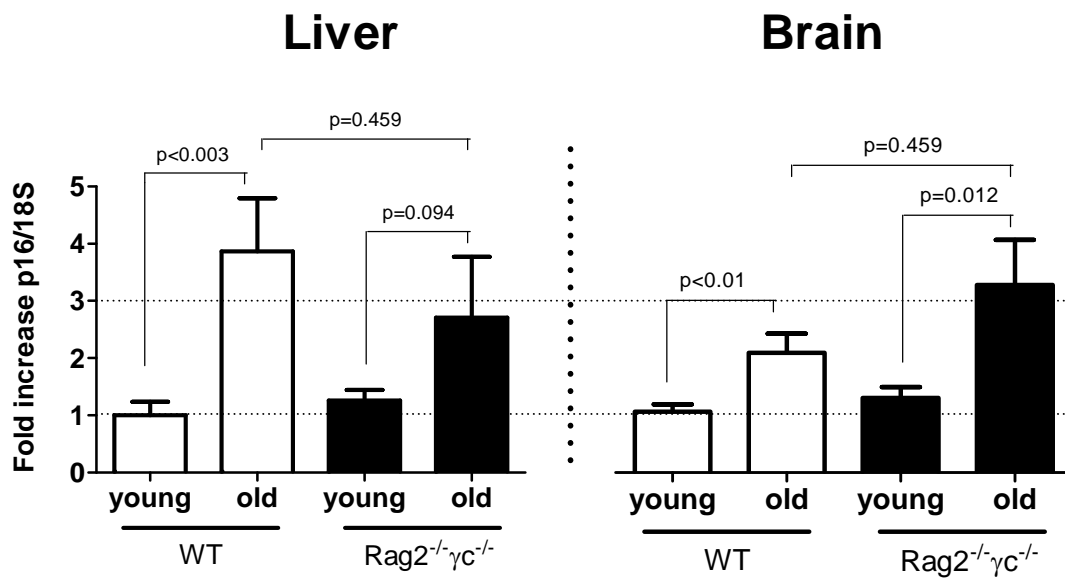

Le et al. Figure S4

**A**

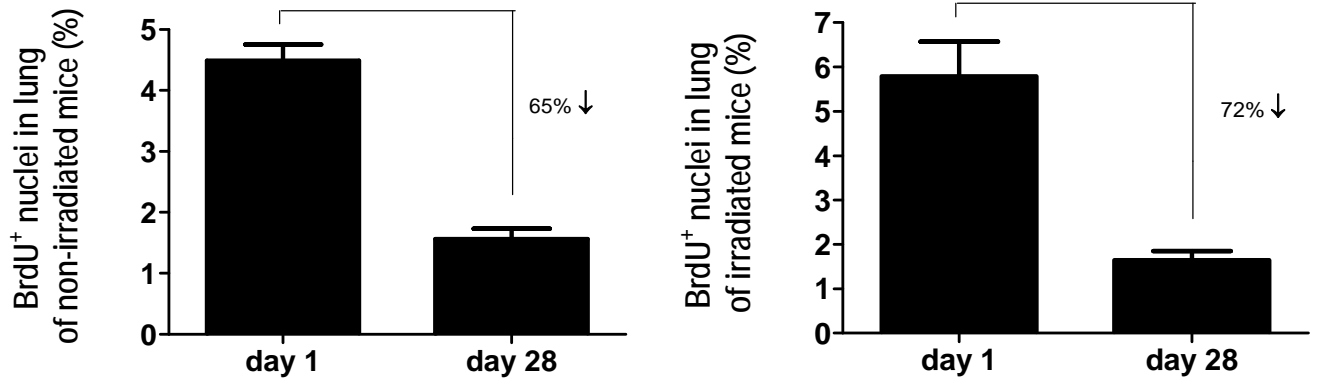

**B**

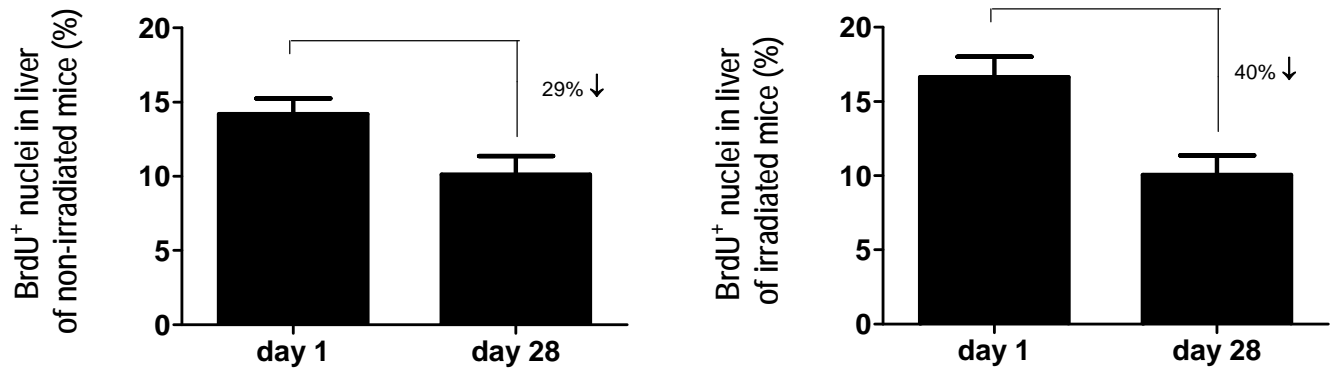

**C**

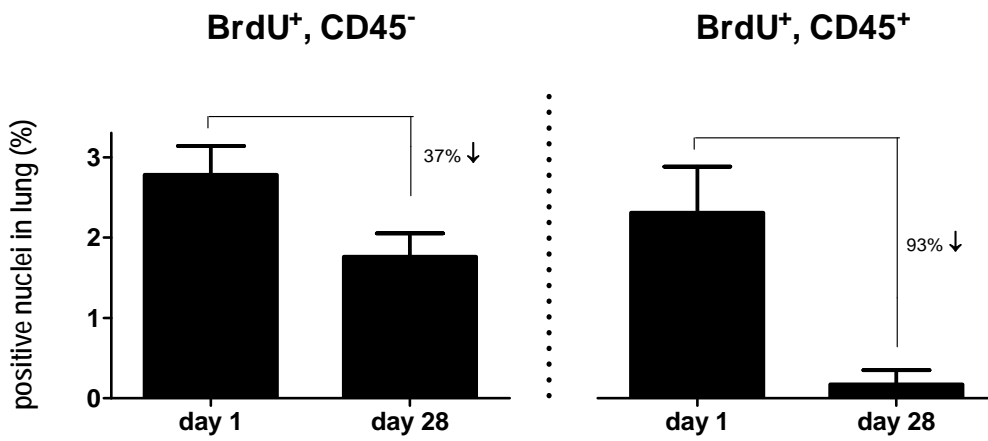

A)

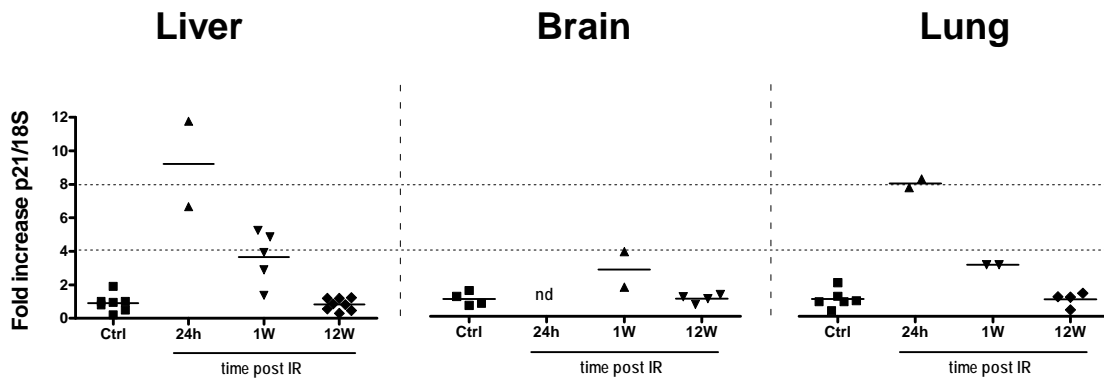

B)

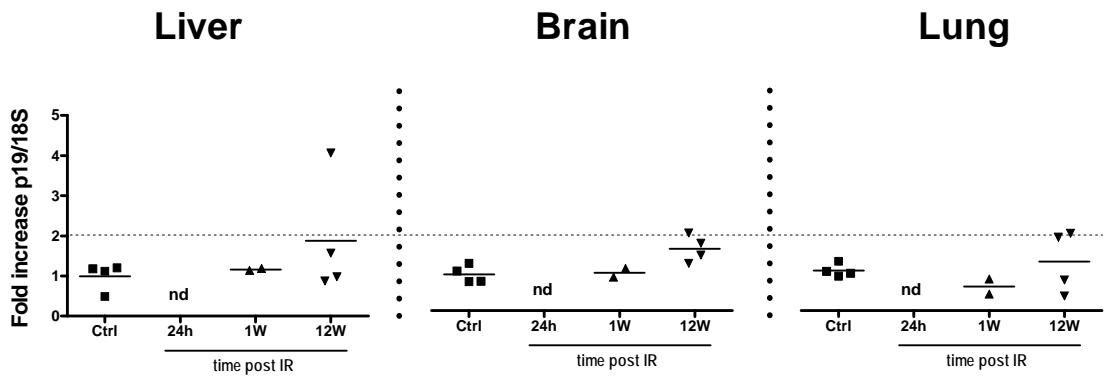

## Supplementary figures

**Figure S1. 53BP1 DNA damage positive-cells in tissues of C57BL/6 mice with age.** Fraction of cells containing 53BP1 DNA damage foci in liver, brain and lung tissues collected from control non-irradiated C57BL/6 mice sacrificed at the indicated age in months (M). Data are mean values  $\pm$  s.e.m (n= 4-7).

**Figure S2. p16<sup>INK4a</sup> expression in mouse skin post exposure to IR.** Expression of p16<sup>INK4a</sup> was determined by quantitative real-time PCR using RNA isolated from homogenized full thickness skin biopsies collected from C57BL/6 mice sacrificed 12 weeks post exposure or not to 8 Gy TBI (n = 9 mice per group). p values were obtained by performing a Student's t-test relative to control.

**Figure S3. Time course induction of p16<sup>INK4a</sup> expression post exposure to IR.** Expression of p16<sup>INK4a</sup> was determined by quantitative real-time PCR using RNA isolated from homogenized brain tissue collected from C57BL/6 mice exposed or not to 8 Gy TBI and sacrificed at the indicated time post exposure to IR (n = 3-12, each symbol representing an individual mouse). p values were obtained by performing a Student's t-test relative to control.

**Figure S4. Increased p16<sup>INK4a</sup> expression with age is independent of T, B and NK cell functions.** Expression of p16<sup>INK4a</sup> was determined by quantitative real-time PCR on liver and brain tissues collected from young (3 months) and old (18 months) wild type (WT) or Rag2<sup>-/-</sup>γC<sup>-</sup>

<sup>1/2</sup> immune deficient mice (n = 3-6 mice per group). p values were obtained by performing a Student's t-test.

**Figure S5. Clearance of BrdU<sup>+</sup> cells post IR exposure. A-B)** Loss of BrdU signal as detected by immunofluorescence on lung and liver tissues collected at day 1 or 28 post exposure or not to 8 Gy TBI. Indicated is the proportion of cells that have lost BrdU signal during the 28 days period post IR. **C)** Loss of BrdU signal from CD45 (pan-leukocyte marker) positive and CD45 negative cells identified by immunofluorescence in lung. n = 4 in each group. Indicated is the proportion of cells that have lost BrdU signal during the 28 days period post IR.

**Figure S6. Expression of p21 and p19 in mice tissues exposed to IR.** Expression of p21 and p19 genes was determined by quantitative real-time PCR using RNA isolated from homogenized liver, brain and lung tissues collected from young (ctrl, 3-6 months), old (24 months) or from young (3 months) animals exposed to 8 Gy total body IR and sacrificed at the indicated time (hours or weeks) post IR. Data are mean values  $\pm$  s.e.m. n = 2-8 mice per group with each symbol representing an individual mouse.
